# Supplementary material for: Two-dimensional materials in functional three-dimensional architectures with applications in photodetection and imaging
Source: PubMed Central journal article supplement (PMC5897379; doi:10.1038/s41467-018-03870-0), 2018-04-12
Supplement: 41467_2018_3870_MOESM2_ESM.pdf [file 41467_2018_3870_MOESM2_ESM.pdf]

## **Description of Additional Supplementary Files**

File Name: Supplementary Movie 1

Description: FEA of the 3D hemisphere structures during compressive buckling, showing the distributions of maximum principal strains.

File Name: Supplementary Movie 2

Description: The stability of 3D photodetector array for stretching, bending and twisting.

File Name: Supplementary Movie 3

Description: In situ measurement of 3D photodetector.
